# Supplementary material for: Reactive Centre Loop Mutagenesis of SerpinB3 to Target TMPRSS2 and Furin: Inhibition of SARS-CoV-2 Cell Entry and Replication
Source: MDPI journal article supplement (doi:10.3390/ijms232012522), 2022-10-19
Supplement: s1 [file s1]

## Supplementary Materials

**Table S1- Primer sequence for generation of SerpinB3 Variants**

| Variant                                         |         | Sequence                                                  |
|-------------------------------------------------|---------|-----------------------------------------------------------|
| <b>B3 - TMP</b>                                 | Forward | 5' atc caa ttt aga gtc tca cct gct tca act aat gaa 3'     |
|                                                 | Reverse | 5' gac tct aaa ttg gat tac agc ggt ggc agc tgc agc 3'     |
| <b>B3 - Furin</b>                               | Forward | 5' gta cgc aat tca cgc tca tca cct gct tca act aat gaa 3' |
|                                                 | Reverse | 5' tga gcg tga att gcg tac tac agc ggt ggc agc tgc agc 3' |
| <b>B3 - S<sub>MBC</sub> <math>\alpha</math></b> | Forward | 5' aac agc ccg cgc cgc gcc cgc tca tca cct gct tca act 3' |
|                                                 | Reverse | 5' gcg ggc gcg gcg cgg gct gtt ggt ggc agc tgc agc ttc 3' |
| <b>B3 - S<sub>MBC</sub> <math>\delta</math></b> | Forward | 5' gct gcc acc aac agc cgg cgc cgc gcc cgc tca 3'         |
|                                                 | Reverse | 5' tga gcg ggc gcg gcg ccg gct gtt ggt ggc agc 3'         |

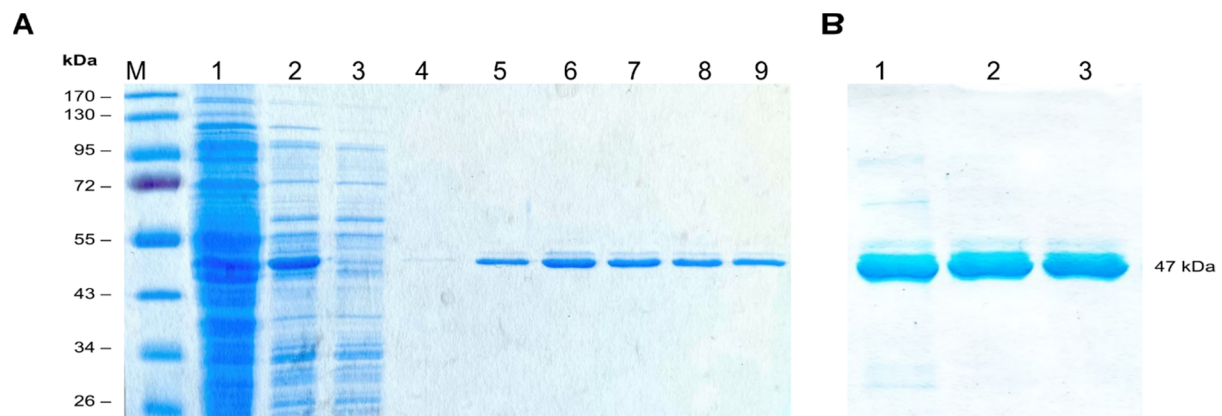

**Figure S1. (A) Ion exchange and IMAC elution profiles of soluble fraction of SerpinB3 WT.** Lane M = pre-stained protein marker, Lane1 = Filtered fraction, Lane2 = Unbound fraction after Ion exchange at pH 7.0, Lane3 = Unbound fraction after IMAC, Lane4 = Wash fraction, Lane5-9 = Eluted fractions, **(B) Concentrated and desalted SerpinB3 variants for cell infection studies.** Lane1 = B3-WT, Lane2 = B3-TMP, Lane3 = B3-Furin.

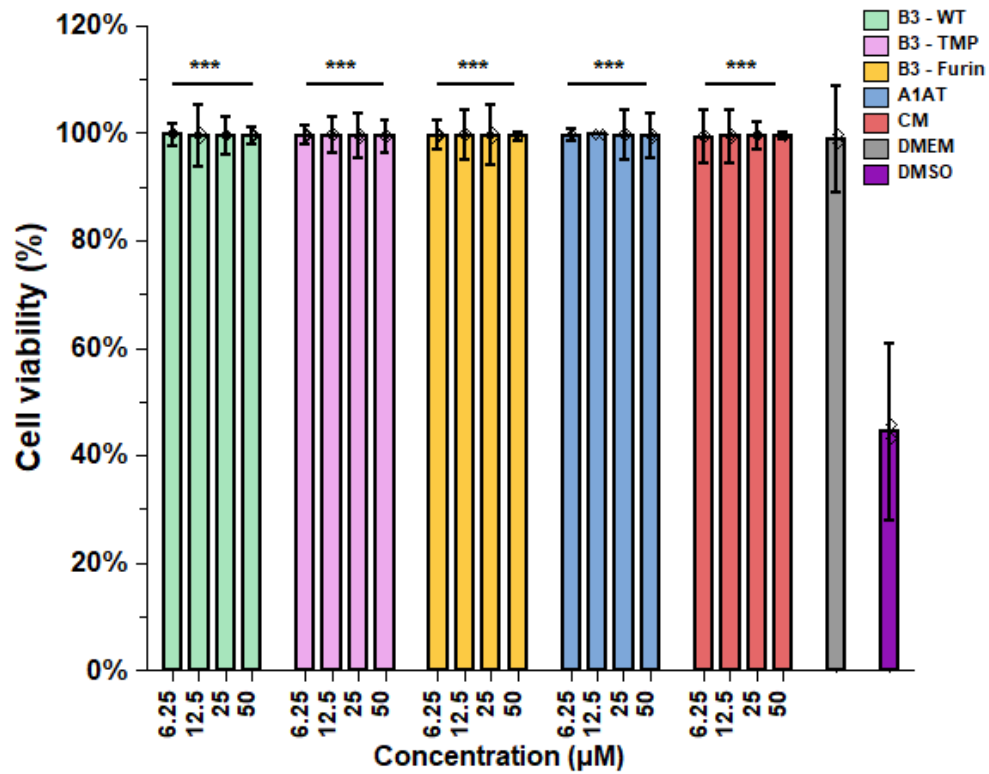

**Figure S2. Cell Viability assay of SerpinB3 variants in VeroE6-TMPRSS2 expressing cells.** VeroE6-TMPRSS2 expressing cells were assessed according for their viability after 18 h at the indicated concentrations of Serpin variants, A1AT or CM as described in Section 4.11. DMSO (20%) was used to induce death as a positive control. Results are presented as the mean  $\pm$  SE of 2 independent experiments performed in 6 replicates. 2-way ANOVA with Tukey's comparison test: \*\*\*  $P < 0.0005$ . A1AT, alpha-1 antitrypsin. CM, Camostat mesylate.
